# Supplementary material
Source: Springer Nature journal article supplement (https://www.springermedizin.de/resource/supplementary/13058_2010_9477_MOESM2_ESM.PDF/9702238)
Supplement: MOESM2 [file 9702238]

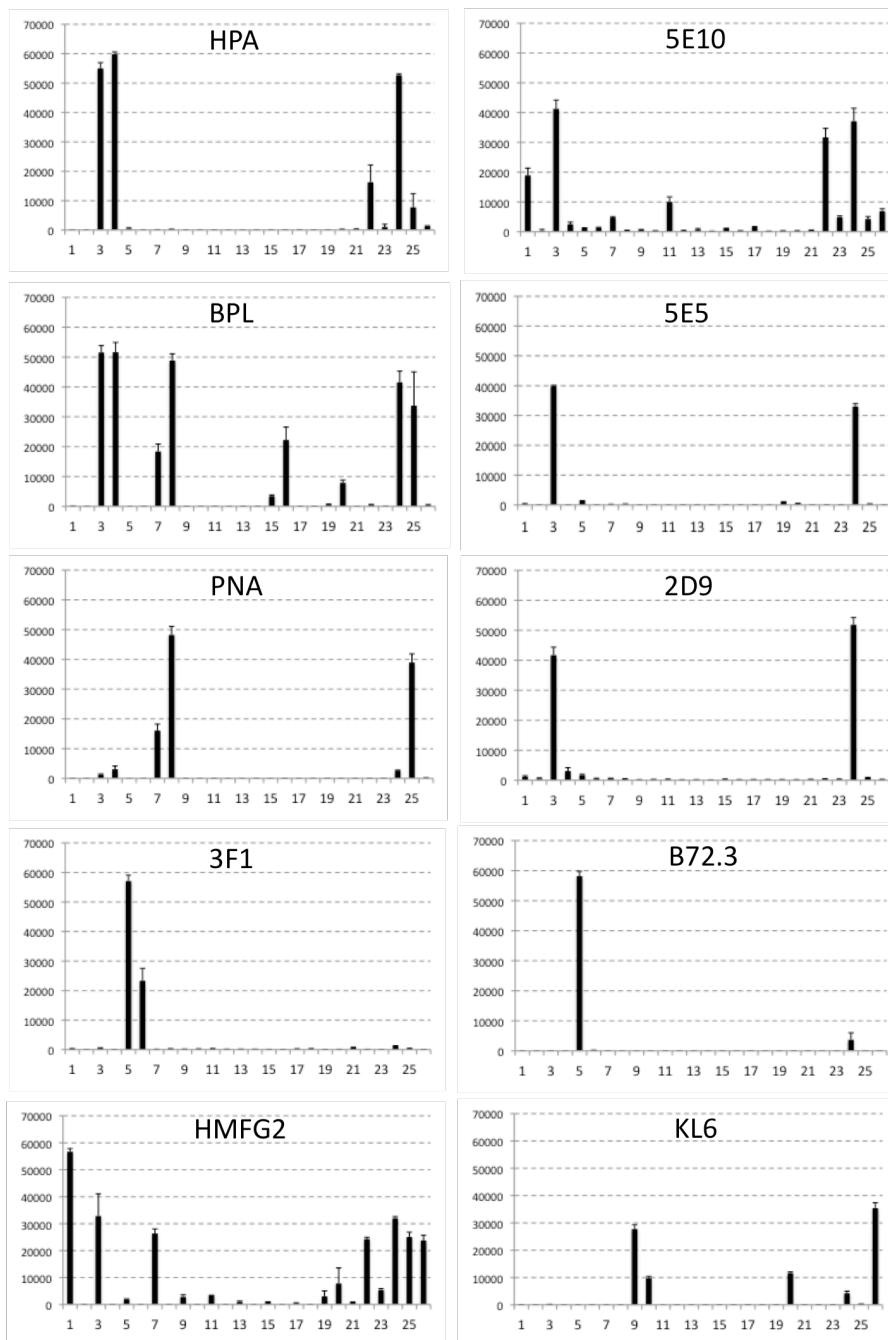

**Supplementary Figure 1:** Lectin and mAb binding to 48-well 20mer glycoform array (see supplementary table 1 for description of glycopeptides). Biotinylated lectins HPA (Sigma), BPL (Vector labs) and PNA (Vector labs) were used at 1ug/mL followed by detection with Streptavidin-Cy3 (Sigma) (1:1000 dilution) using incubation buffer (Material and Methods). Monoclonal antibodies were analyzed at 1ug/mL and detected with anti-mouse IgG –Cy3 labeled secondary antibody (1:1000 dilution).

HPA, specifically binds glycopeptides containing Tn, PNA lectin recognises T glycoforms and BPL recognises both Tn and T glycoforms. 3F1 recognizes any STn- glycoforms whereas mAb B72.3 specifically binds to STn-MUC1a glycopeptide. mAbs HMFG2 binds MUC1a peptides as well as Tn, T and Core-3 MUC1a glycopeptides but not STn-MUC1a. The mAb 5E5, 5E10 and 2D9 are specific to Tn-MUC1a peptides [17,18] and bind to such structures. The KL6 mAb is specific to the ST-MUC1 glycopeptides which is in agreement with recent studies [31].
